1 Limited marginal utility of deep sequencing for HIV drug resistance testing in the age of

2 integrase inhibitors

3

4 Ronit Dalmat<sup>1</sup>,

5 Negar Makhsous<sup>2</sup>,

6 Gregory Pepper<sup>2</sup>,

7 Amalia Magaret<sup>2,3</sup>,

8 Keith R. Jerome<sup>2,3</sup>,

9 Anna Wald<sup>1,2,3,4</sup>

10 Alexander L. Greninger<sup>2,3#</sup>

11 <sup>1</sup>Department of Epidemiology, University of Washington, Seattle, Washington, USA

12 <sup>2</sup>Department of Laboratory Medicine, University of Washington, Seattle, Washington, USA

13 <sup>3</sup>Vaccine and Infectious Disease Division, Fred Hutchinson Cancer Research Center, Seattle

14 Washington, USA

15 <sup>4</sup>Department of Medicine, University of Washington, Seattle, Washington, USA

16

17 #corresponding author,

18 Alex Greninger, 1616 Eastlake Avenue East, Suite 320, Seattle, WA 98102

19 415-439-3448, Fax: 206-616-4340

20 [agrening@uw.edu](mailto:agrening@uw.edu)

21 Running title: NGS for HIV drug resistance

22 Keywords: HIV, antiretroviral, resistance, antiviral resistance, deep sequencing, next-

23 generation sequencing, AIDS, amplicon sequencing, PASEq, Hydra

24 Abstract word count: 287

25 Body word count: 4,683

## Abstract

HIV drug resistance genotyping is a critical tool in the clinical management of HIV infections. Although resistance genotyping has traditionally been conducted using Sanger sequencing, next-generation sequencing (NGS) is emerging as a powerful tool due to its ability to detect lower frequency alleles. However, the value added from NGS approaches to antiviral resistance testing remains to be demonstrated. We compared the variant detection capacity of NGS versus Sanger sequencing methods for resistance genotyping of 144 drug resistance tests (105 protease-reverse transcriptase tests and 39 integrase tests) submitted to our clinical virology laboratory over a four-month period in 2016 for Sanger-based HIV drug resistance testing. NGS detected all true high frequency drug resistance mutations (>20% frequency) found by Sanger sequencing, with greater accuracy in one instance of a Sanger-detected false positive. Freely available online NGS variant callers Hydra and PASEq were superior to Sanger methods for interpretations of allele linkage and automated variant calling. NGS additionally detected low frequency mutations (1-20% frequency) associated with higher levels of drug resistance in 30/105 (29%) of protease-reverse transcriptase tests and 4/39 (10%) of integrase tests. Clinical follow-up of 69 individuals for a median of 674 days found no difference in rates of virological failure between individuals with and without low frequency mutations, although rates of virological failure were higher for individuals with drug-relevant low frequency mutations. However, all 27 individuals who experienced virological failure reported poor adherence to their drug regimen during preceding follow-up time, and all 19 who subsequently improved their adherence achieved viral suppression at later time points consistent with a lack of clinical resistance. In conclusion, in a population with low antiviral resistance emergence, NGS methods detected numerous instances of minor alleles that did not result in subsequent bona fide virological failure due to antiviral resistance.

## Importance

Genotypic antiviral resistance testing for HIV is an essential component of the clinical microbiology and virology laboratory. Next-generation sequencing (NGS) has emerged as a powerful tool for the detection of low frequency sequence variants (allele frequencies <20%). Whether detecting these low frequency mutations in HIV contributes to improved patient health, however, remains unclear. We compared NGS to conventional Sanger sequencing for detecting resistance mutations for 144 HIV drug resistance tests submitted to our clinical virology laboratory and detected low frequency mutations in 24% of tests. Over approximately two years of follow-up for 69 patients for which we had access to electronic health records, no patients had virological failure due to antiviral resistance. Instead, virological failure was entirely explained by medication non-adherence. While larger studies are required, we suggest that detection of low frequency variants by NGS presents limited marginal clinical utility when compared to standard of care.

# Introduction

Antiretroviral drug therapy (ART) for HIV has been tremendously successful in reducing HIV morbidity, mortality, and transmission (1). However, rising rates of HIV infections resistant to antiretroviral drugs pose a major threat to ongoing efforts to control the pandemic (2). Routine HIV drug resistance genotyping improves health outcomes in HIV patients (3, 4) and is a cost-effective tool in the clinical management of HIV infection (5).

Genotypic resistance testing assays have traditionally been based on Sanger sequencing (6). While Sanger methods are highly reproducible and validated, minority HIV resistance mutations present in less than 20% of the viral population may escape detection (with a range of approximately 10-30%, depending on the sample context) (6, 7). The capacity of next-generation sequencing (NGS) to provide additional data on low-frequency drug resistant mutations (DRMs) and its potential for lower costs per sample with large batches has led many clinical laboratories to consider transitioning from Sanger sequencing to NGS (8, 9). A commercial NGS HIV drug resistance test has recently received European and Singaporean in vitro diagnostics approval (10). Numerous previous studies have demonstrated NGS methods detect more resistance-associated mutations at low frequencies that Sanger is unable to detect (11-20). However, the predictive value of detectable low frequency mutations for virological failure or other clinical outcomes remains unclear (21-23).

Anticipating the potential utility of NGS for HIV drug resistance detection is also complicated by the ever-changing landscape of HIV therapy. A previous pooled analysis of HIV-1 resistance mutations associated with NNRTI resistance found a dose-dependent increased risk of virological failure with first-line ART (24). However, prior studies seeking to associate low frequency DRMs with virological failure provide insufficient evidence of NGS utility because they lacked an appropriate retrospective comparison group (15), were

conducted within a clinical trial (12) (thus lacking representation of real-world patient samples submitted for genotyping in routine care), or were conducted more than 3 years ago and thus focused on NNRTIs (11, 24). Current ART treatment guidelines for treatment-naïve HIV-1-infected patients include an integrase strand transfer inhibitor (INSTI) (25). Dolutegravir is a particularly promising therapy due to its high barrier to resistance (26-28). Given that recent studies of low frequency resistance mutations during integrase and protease inhibitor-based treatments have generally failed to find an association with virological failure (27, 29-34), the clinical value of NGS sequencing for a standard clinical laboratory requires more investigation.

Our reference laboratory provides clinical virology testing for patients in the western Washington region and performed 817 HIV resistance genotyping tests in 2017. Recently, Seattle became one of the first metropolitan areas in the world to attain the 90-90-90 UNAIDS treatment goals, wherein 90% of the patients receiving ART achieve viral suppression (35). Clearly, these goals were reached in the absence of NGS drug resistance testing. Given the concomitant interest in the perceived superiority of NGS for drug resistance in the setting of already successful drug resistance management, we sought 1) to evaluate the technical capacity of Sanger versus NGS sequencing methods for samples submitted to our clinical virology laboratory for HIV resistance genotyping, and 2) to assess the clinical impact of low frequency DRMs detected only by NGS on viral suppression over time.

## Materials and Methods

### Test cohort

Serum/plasma for HIV antiviral resistance testing were collected as part of routine care and Sanger sequenced for antiviral resistance in our reference clinical virology laboratory using

a nested RT-PCR approach described below (Figure 1A)(36). To best compare Sanger versus NGS and to limit PCR cycles prior to NGS library preparation for more accurate allelic representation, we used stored first-round RT-PCR amplicons from prior HIV drug resistance testing: 105 protease-reverse transcriptase (Pr-RT) and 39 integrase (INT) amplicons. To allow clinical follow-up while maintaining drug resistance testing relevance for current HIV regimens, we performed NGS testing on amplicons from tests originally performed approximately two years ago (February to May 2016). Ethical approval for this study was granted by the University of Washington Institutional Review Board.

**Sanger sequencing, variant calling, and interpretation.** Results of previous genotypic resistance assays performed by our clinical virology laboratory were obtained as the standard of care comparison group. Plasma/serum were previously processed through the laboratory's standardized HIV genotypic resistance assay protocol, which involves HIV RNA separated from plasma via the Boom method silica extraction (37). Extracted RNA was used in a RT-PCR reaction using random hexamers to create cDNA with reagents from GeneAmp RNA PCR kit (Perkin-Elmer, Foster City, CA) according to the manufacturer's protocol.

Nested PCR amplification was performed in 50ul volume reactions, consisting of 5ul 10X PCR buffer (with 15mM MgCl<sub>2</sub>), 8 ul dNTP's (1.25mM each), 1ul each forward and reverse primer (20pmol/ul), 0.5 ul Taq (2.5 units per 10µl cDNA sample for first-round PCR; 2.5 units per 5µl PCR product for second round PCR), and nuclease free water. A list of primers is provided in Supplementary Table S-1. A thermal cycler protocol programmed for 94°C x 5 minutes for initial denaturation, followed by 35 cycles of 15 seconds at 94°C for denaturation, 30 seconds at 57°C for annealing, 2 min at 72 °C for extension, and final extension at 72 °C for 7 minutes. An annealing temperature of 55 °C was used for second round nested PCR.

A sample of the first-round PCR product was stored in a -20°C sample archive. The second-round PCR product was visualized on a UV light box (254nm wavelength) after gel electrophoresis [1.5 % agarose ethidium bromide gel with 1X Tris Acetate-EDTA buffer (TAE) (Sigma T9650-1L) run at 80mV for 30 minutes. This PCR product was cleaned by adding 2 ul of Exonuclease I and Shrimp Alkaline Phosphatase directly to 10 ul PCR product without changing buffer conditions. Thermal cycler programmed for 37°C x 15 minutes, 80°C x 15 minutes, 4° C x infinity. Each sample was diluted with nuclease free water to achieve a final concentration 10-40 ng per reaction. Each sequencing primer (5.0 pmol/uL) was added to 10ul of the pre-cleaned diluted PCR template in a pre-labelled PCR Genemate Skirted 96 well PCR plate (T-3107-1).

The samples were sent to a centralized sequencing facility. A Big Dye terminator kit was used for the sequencing reaction. Montage SEQ96 Millipore sequence clean up kit was used for post sequencing. Samples were analyzed using 3730 XI ABI instrument and sequence analysis performed using Sequencher software v5.2.2

Criteria for acceptable data included: raw data peak intensities between 1000 and 5000, average noise intensity <15%, pure base QV rated high and no abrupt signal changes, elevated base line or spikes. Variant mixes were called when visible in both forward and reverse reads, with and minor peaks visible for at least 25% surface area of the major peak.

Results were recorded in a genotypic resistance assay report that was returned to the patient's care provider via the electronic medical record. The report includes a list of mutations associated with drug resistance in the three *pol* gene segments (protease, reverse transcriptase, and integrase) and an interpretation of the resistance profile (what drugs should be avoided) based on the detected mutations. Mutations listed in the genotypic resistance assay report were also interpreted using the Stanford HIV Drug Resistance Database (HIVdb version 8.5) (38). For each mutation, levels of resistance were recorded

categorically according to the HIVdb standard categories: (0) no evidence of resistance; (1) potential low-level resistance; (2) low level resistance; (3) intermediate resistance; and (4) high level resistance. A sample was considered to have any resistance if it had one or more mutations categorized as a level 1 or higher.

**NGS sequencing, variant calling, and interpretation.** First-round amplicons for each test were retrieved from -20°C archive and cleaned using 1.0X Ampure beads, quantitated on a Qubit 3.0, and diluted to 1 ng/μL. Libraries were prepped using quarter-reactions of Nextera XT followed by 15 cycles of dual-indexed PCR amplification and sequenced to achieve between 50,000-100,000 reads per sample on an Illumina MiSeq using both 1x192 and 2x300 bp runs. Amplicons with less than 10,000x coverage were excluded to ensure sufficient coverage for detection of low frequency mutations. Samples were sequenced in batches of 20-24 samples to minimize the possibility of index cross-talk on the MiSeq platform and each included positive (8E5 cell line) and negative (nuclease-free water) controls to confirm the run. Sequences were preprocessed using cutadapt (39) and uploaded to two online variant callers: PASEq (<https://www.paseq.org/>) and HyDRA (<https://hydra.canada.ca/>). These two variant callers were selected because they are highly-developed, free variant callers with user-friendly web interfaces that require minimal bioinformatics skills and provide robust, reproducible, and easy-to-interpret results that could be implemented in a clinical laboratory (40). Both callers use an annotated HXB2 sequence as their reference for variant calling and the well-established Stanford HIV Drug Resistance Database (version at time of use: 8.5) to provide resistance interpretations for DRMs.

A “low frequency” DRM was defined as a resistance-associated mutation between 1% and 20% allele frequency, based on the default 1% minimum allele frequency needed

for a mutation to be considered in the drug resistance report produced by both HyDRA and PAsEq (40, 41). A DRM was considered “high frequency” if detected at greater than 20% allele frequency. Resistance interpretations were determined by the same method described above for Sanger-detected mutations.

# **Patient characteristics and clinical record abstraction for patient follow-up cohort.**

Patients’ age, sex, and sample date (baseline) were determined based on patient demographics recorded on the genotypic resistance assay report for all patients included in the test cohort. Electronic medical records were reviewed for clinical outcomes. Patients lacking a recorded plasma HIV RNA test result between the sample date and May 25, 2018 were excluded from the patient follow-up cohort due to lack of available follow-up. Laboratory and clinical visit records for patients included in the follow-up cohort were abstracted using a structured data form (information collected is described below), which was designed based on a preliminary in-depth search of five records prior to full record search and abstraction.

The following information was recorded for each patient: date of first plasma HIV RNA test in our laboratory information system, plasma HIV RNA load at date of sample (or nearest date), drug regimen prescribed by clinician during clinic visit subsequent to sample date (when both plasma HIV RNA measurement and HIV genotyping results were available to inform clinician actions), and date of most recent office visit where HIV care was received. Adherence (yes/no) was assessed based on clinician visit notes as to whether the patient reported being adherent to the drug regimen prescribed at each clinic visit after baseline. Treatment experience was assessed as (naïve/experienced) based on whether a new diagnosis or initiation of first treatment was noted in the clinical record at baseline clinic date.

The primary outcome of interest, virological failure (yes/no), was determined according to the U.S. Health and Human Services definition—failing to achieve or maintain suppression of viral replication to a plasma HIV RNA level  $\leq 200$  copies/mL (42)—at a test date more than one month after beginning treatment regimen. Prescribed drug regimens were extracted from the medical record. Low frequency mutation exposure was categorized as present/absent, according to whether the Stanford HIVdb resistance profile determined by NGS was higher in level of resistance compared to the profile reported by Sanger data in the clinical record. In a second calculation of risk, exposure was determined as present when a patient was prescribed a drug regimen which would have been contraindicated based on the resistance profile (including low-frequency mutations) found by NGS.

## Statistical analyses

Agreement of DRMs called by each NGS caller (HyDRA and PASEq) was analyzed for concordance using percent agreement and Cohen’s Kappa (a standard agreement coefficient for binary ratings). The PASEq and HyDRA allele frequency measures for all called mutations were compared by linear regression analysis. Any variants not called by either caller were assumed to be 0% allele frequency and excluded from the concordance analysis due to absence of quantitation. The linear model coefficient (HyDRA’s allele frequency measurement as a function of PASEq’s) was also reported. Incidence rate of virological failure was determined based on patients’ first occurrence of HIV RNA level  $\geq 200$  copies/mL divided by time at risk (between sample date and censored date). Patients were censored at date of measured virological failure or last available plasma HIV RNA quantification test prior to May 25, 2018. Relative virological failure rate ratios were calculated using the *fmsb* package (43) and all statistical analyses were conducted in R (version 3.4.3) through the RStudio interface (version 1.0.153).

240

## 241 Results

### 242 NGS estimated higher levels of drug resistance in test cohort.

243 Of 144 total tests, 29 patients had both Pr-RT and INT tests ordered for them during the  
244 sample period and two patients had a repeat Pr-RT test ordered in the sample period.  
245 Therefore, a total of 113 unique patients were ultimately included in the test cohort (Figure  
246 1B). Patients were predominantly male (91%) with a median age of 40 (range, 5-67). Most  
247 (95%) had HIV subtype B, 5 patients had subtype C (contributing 6 tests), and one had  
248 subtype A (1 test). Additional descriptive statistics for the test cohort are listed in Table 1.

249 Using the standard of care genotyping test by Sanger sequencing, 40 (28%) tests  
250 were positive for resistance to at least one drug. By NGS, 63 (44%) tests were positive for  
251 resistance by PASEq and 60 (42%) by HyDRA. NNRTI resistance was most common among  
252 both methods; PI and INSTI resistance were least common (Table 1). Of 105 Pr-RT tests,  
253 Sanger detected 2 (2%) with PI DRMs, 18 (17%) with NRTI DRMs, and 28 (27%) with  
254 NNRTI DRMs. Among 39 INT tests, 1 (3%) had a DRM associated with resistance to INSTI.  
255 PASEq detected 9 (9%) more samples with PI resistance; 6 (6%) more samples with NRTI  
256 resistance, 11 (10%) more samples with NNRTI resistance, and 3 (8%) more samples with  
257 INSTI resistance. HyDRA found similarly higher resistance compared to Sanger: 9 (9%)  
258 more samples with PI DRMs, 8 (8%) more with NNRTI DRMs, 7 (9%) more with NRTI  
259 DRMs, and 4 more (10%) with INSTI DRMs. Overall, NGS estimated higher levels of drug  
260 resistance to one or more antiretroviral drugs for 34 (24%) tests—30/105 (29%) protease-  
261 reverse transcriptase tests and 4/39 (10%) of integrase tests.

262

### 263 Sanger and NGS variant calls have high concordance with some limitations.

Sanger and NGS showed almost perfect agreement in their detection of high frequency DRMs (97% of tests). In total, four unexpected differences were observed in a comparison of Sanger versus NGS-detected variant calls (overview in Figure 2 and Figure S-1; detailed in Figure 3A-D). All were the result of position-specific over-interpretation of variants in Sanger. One Pr-RT test was discordant in the mutation called, resulting in a false-positive error by Sanger for antiviral susceptibility. Sanger called a mixed L210CW mutation, which is associated with high resistance to didanosine (ddI), abacavir (ABC) and tenofovir (TDF) (38). NGS, however, did not call this mutation (Figure 3A). Upon manual inspection of the NGS sequence, it became clear that the Sanger read was a false positive for resistance due to the inability of Sanger to interpret linkage between two adjacent nucleotide bases. In this instance, the reference codon was TTG (L - leucine) but the viral population contained a mix of the reference codon and TGT (C - cysteine). Thus, NGS read the variant as L210C and did not call it as a DRM. Sanger, on the other hand, interpreted the codon as having a mix of Gs at both the second and third bases, which led to an interpretation of TGT (C - cysteine) and TGG (W - tryptophan). In three other Pr-RT tests, Sanger reported mutations that were detected at less than 20% allele frequency by NGS: V108I was called by HyDRA (15.9%) and PASEq (17.1%) (Figure 3B), K103N was called by HyDRA (8.9%) and PASEq (7.0%), and H221Y was called by HyDRA (17.9%) and PASEq (17.7%) (Figure 3C). These results demonstrate that DRMs at allele frequencies under 20% can be detected by Sanger sequencing.

# **NGS callers HyDRA and PASEq are essentially equivalent in their DRM calls.**

At a 20% allele frequency threshold, HyDRA and PASEq had 100% agreement in terms of which mutations they detected (binary: detected/not; Kappa = 1.0). Concordance of DRM allele frequencies (continuous: 0-100%; Bland-Altman plot in Figure 4A) detected

by HyDRA versus PASEq was also very high (linear model coefficient = 1.00;  $R^2 = 1.00$ ). Of note, HyDRA reported many more accessory variants and polymorphisms compared to PASEq (Figure 4B). Of 56 unique DRMs detected among 105 Pr-RT sequences and 3 unique DRMs detected in 39 INT sequences, 40 (71%) and 3 (100%) mutations, respectively, were detected with perfect agreement between the callers (Kappa = 1.0).

DRMs on which the two callers disagreed were predominantly very low frequency calls (Figure 4B); the median frequency of mutations detected only by either HyDRA or PASEq (and thus “missed” by the other) was 1.15%. Upon manual inspection of DRMs between 1-2% allele frequency, the discrepancies were attributable to minute differences in the number of reads registered by each caller. For further comparisons of NGS and Sanger results, the callers were assumed to have performed sufficiently similarly and thus the variant and resistance profiles called by HyDRA were used to represent the NGS results for subsequent analyses comparing NGS to Sanger in the patient follow-up cohort.

### **Patient follow-up cohort included 69 patients followed for an average of 674 days.**

Of 113 patients included in the test cohort, 69 received care at UW Medicine and had obtainable clinical follow-up data. The median follow-up time was 674 days (IQR: 560-728 days). This cohort was a subset of the test cohort, with a similar age and sex distribution (median age = 40; 88% men) and prevalence of low frequency DRMs (32% of patients). Summary statistics for the cohort are provided in Table 2. A higher proportion of patients with low frequency DRMs were female, compared to those without. In the patient cohort, 27 patients (39%) experienced virological failure of any plasma HIV RNA  $\geq 200$  copies/mL during the follow-up period, 12 (17%) patients had changes to their drug regimen in follow-up and 12 (17%) patients received additional Sanger resistance tests as part of regular care.

None of these additional Sanger resistance tests detected any additional DRMs compared to the baseline Sanger resistance test.

**NGS detected more resistance mutations but these did not significantly associate with virological failure, which was more likely attributable to drug non-adherence.**

Of 69 patients with clinical follow-up, 22 (32%) had low frequency DRMs detected by NGS that were not found by Sanger. Low frequency DRMs were most commonly associated with NRTI resistance (9 patients), followed by NNRTI (7 patients), PI (6 patients), and INSTI (4 patients). Five (7%) patients received drugs which would have been contraindicated based on the resistance profiles found by NGS.

We were not able to detect a difference in the risk of virologic failure between patients with any low frequency DRMs at baseline compared to those without (RR = 1.61; 95% CI: 0.75-3.48). Three patients had only level 1 low frequency DRMs; when we restrict our exposure definition to patients with level 2 or higher resistance (see definition provided in methods section), the virological failure rate in patients with any low frequency DRMs is not significantly higher than in those without (RR = 1.80; 95% CI: 0.82 – 3.92). Among five patients with low frequency DRMs specifically associated with one of their prescribed drugs, four experienced virological failure. Compared to patients without affected regimens, these five patients had a higher rate of virological failure (RR = 3.61; 95% CI: 1.25-10.44).

However, all participants who experienced virological failure and subsequently reported improved adherence to their drug regimen were able to achieve viral suppression—regardless of whether or not they had low frequency DRMs—even though most of them (16 of 19 patients) did not change drug regimens in that time period (Figure 5A).

## Discussion

Our study suggests a limited marginal utility of next-generation sequencing compared to Sanger sequencing for determining HIV antiviral drug resistance in a population with a relatively low prevalence of antiviral resistance. We also demonstrate two free, online variant callers PASEq and HyDRA were marginally superior compared to Sanger sequencing for detection of high frequency DRMs. Both NGS callers were highly concordant with each other in respect to their measured allele frequencies for DRMs. Besides HyDRA's automatic reporting of many more accessory variants and polymorphisms compared to PASEq, the two callers provided nearly interchangeable results.

PASEq and HyDRA improve upon Sanger sequencing's manual variant calling procedures by being free and automated, and thus faster, easier, and less expensive. Our study also illustrated two limitations of manual examination procedures for interpreting Sanger chromatograms: missing linkage and reliance on trained laboratory professionals. First, Sanger was unable to impute linkage between two alleles, which manifested as a DRM mixture (L210CW) instead of a polymorphism (L210C). In this example case, the erred call was a false-resistance determination that did not negatively impact patient care because the potentially affected drug types are uncommonly prescribed in this care setting, and the erred variant call is associated with only potential and low levels of associated resistance (zidovudine, stavudine, and didanosine) according to HIVdb. Second, Sanger called three resistance mutations that were below Sanger's expected 20% threshold of sensitivity. This "over-calling" is illustrative of how the procedures rely on a highly-trained lab technician to review DRM regions in a Sanger sequenced resistance test—had the technician not been experienced enough to expect a DRM in that location, it may have been missed. Both manifestations of Sanger "error" resulted from the human element of Sanger variant calling. Given the ease of use and technical capacity of HyDRA and PASEq, the two callers are both

pragmatic options for the detection of variants and interpretation of NGS results in clinical laboratory HIV resistance testing.

In our comparison of overall DRM detection rates, NGS detected more mutations associated with higher levels of drug resistance in 30/105 (29%) of Pr-RT sequences and 4/39 (10%) of INT sequences, due to its capacity to detect low frequency DRMs. These findings are consistent with numerous studies in which NGS detected more DRMs compared to Sanger (11-14, 16-20). However, few studies have performed clinical follow up after detection of low frequency DRMs to determine whether the additional DRMs are relevant to patient care or outcomes. Here, we have presented the first study to investigate the effect of low frequency DRMs on viral suppression in patients on multi-drug therapeutic regimens in a pragmatic retrospective cohort of samples submitted for routine HIV antiviral resistance genotyping to a clinical virology lab.

We found that the 7% of patients prescribed a drug regimen to which they may have been contraindicated based on low frequency DRMs detected by NGS may be at higher risk of virological failure compared to patients without drug-regimen associated DRMs. With 69 patients and a 34% rate of virological failure in those *without* DRMs, we had 80% power to detect increases in the virological failure rate among those *with* DRMs at 75% failure rate or higher. All virological failures in the cohort were associated with medication non-adherence. Low frequency DRMs were most commonly associated with NRTI and NNRTI resistance, even though NNRTI drugs were rarely included in drug regimens of patients in the follow-up cohort (3 patients; 4%). This finding is consistent with previous research (20, 44, 45) and suggests that some proportion of DRMs may have originated during prior drug experience or been transmitted upon infection. Low frequency DRMs may also arise *de novo* as part of natural viral diversification in the body (46). Poor adherence to ART muddles the association between low frequency mutations and virological failure because it can

contribute to the emergence of resistant viral subpopulations (observed as low frequency DRMs), as well as be a primary cause of a patient's high plasma HIV RNA (Figure 5B). The association may also be confounded by higher viral loads, which could increase the likelihood that a minor variant is present in a sufficient quantity for detection by NGS. However, we think the contribution of this source of confounding is minimal in our study because the laboratory acceptance criteria for the test is 1000 copies/mL and just eight (6%) tests were below this threshold. Furthermore, low frequency variants were detected across a range of viral loads (Figure S2).

More than 80% of patients in our cohort were prescribed a regimen that included an integrase inhibitor at baseline. However, despite this high prevalence of INSTI prescriptions and low prevalence of INSTI resistance mutations, 39% of patients in the cohort experienced virological failure (70% of whom were on an INSTI-based regimen), and just four (15%) failures occurred in patients on drug regimens contraindicated by their NGS resistance profile. Furthermore, the majority of patients never changed drug regimens following their "virological failure," and patients who continued to report poor adherence experienced uncontrolled viral loads well over 200 copies/mL for the duration of follow-up while those with improved adherence achieved suppression (below the limit of detection; <40 copies/mL). This suggests that poor adherence may be a primary factor affecting rates of viral suppression in this cohort, irrespective of the prevalence of low frequency DRMs.

By evaluating the utility of NGS in the context of a pragmatic patient population, we provide a real-world example of its potential to inform clinical care and elucidate factors that could affect its implementation. Our focus on a single high-resource setting is a potential limitation of the study. Seattle is unique in already having achieved UNAIDS goals of 90% of patients on ARV with suppressed virological loads, indicating a smaller potential return on investment for NGS antiviral testing and a low overall prevalence of antiviral

resistance. In a high-resource clinical setting, any indication of resistance on a Sanger resistance assay report—even at low levels—is sufficient to rule out that drug for an ARV regimen. DRMs causing any degree of change to the level of resistance interpreted by HIVdb were therefore considered in this analysis. In less resource-rich settings, however, “potential” (level 1) and “low-level” (level 2) resistance may need to be excluded from the analysis because their clinical significance is not well understood and may be overly conservative for prescribing practices in resource-limited settings.

Another limitation of our study is its low power. Despite significant efforts exerted to obtain a sufficiently large cohort size for the analysis, more than a third of patients in the test cohort were excluded from the sample cohort due to lack of follow-up (or inability to obtain medical records). The exclusion of these individuals is not a major concern as a source of selection bias because loss to follow-up is a regular occurrence in the course of clinical management and remains representative of a pragmatic population receiving testing in a clinical lab. Given the clinical and potential economic importance of this study’s objectives, a long-term cohort study involving many more patients receiving HIV care and repeat sequencing is needed. However, we also caution that such a study may have limited generalizability in the current age of fast-changing HIV clinical pharmacology. As has been the case for efforts to interpret prior similar studies conducted in populations and time periods without integrase inhibitors (11, 24), evolving treatment regimens make it difficult to develop informative pragmatic cohort studies to validate the clinical relevance of low frequency variants.

Regardless, our findings demonstrate two online, free, and easy-to-use NGS variant callers have high concordance with Sanger in a pragmatic clinical setting and thus may be good candidates for implementation as part of a clinical laboratory analysis pipeline for HIV drug resistance. However, given growing prevalence of integrase inhibitor regimens with

high barriers to resistance and high prevalence of low frequency DRMs (predominantly NNRTI and NRTI) in patients with poor adherence, we suggest clinical laboratories use caution in overvaluing the low-frequency variant detection afforded by NGS for clinical antiretroviral resistance genotyping as it may not provide much improvement over standardized Sanger methods for detection of clinically relevant resistance in a real-world context.

#### **Acknowledgements**

The authors would like to thank Ryan C. Shean for help with data and metadata submission to NCBI as well as the patients and families served by the University of Washington Virology Lab. ALG reports prior consulting for Abbott Molecular.

## Table and Figures

**Table 1.** Demographic and clinical characteristics of patients included in the test cohort.

| Patient characteristics <sup>1</sup>                                             | (n = 113)          |         |
|----------------------------------------------------------------------------------|--------------------|---------|
| Patient age, median (IQR)                                                        | 40 (33-49)         |         |
| Men, n (%) <sup>1</sup>                                                          | 103 (91)           |         |
| Plasma HIV RNA at baseline [log10(copies/mL)] – median (IQR)                     | 4.2 (3.7-4.8)      |         |
| Missing plasma HIV RNA measure at baseline                                       | 27 (24)            |         |
| B subtype, n (%)                                                                 | 107 (95)           |         |
| C subtype                                                                        | 5                  |         |
| A subtype                                                                        | 1                  |         |
| Test characteristics                                                             | (n = 144)          |         |
| Any (≥1) DRM reported by clinical genotyping (Sanger sequencing), n (% of tests) | 40 (28)            |         |
| PI                                                                               | 2 (2)              |         |
| NRTI                                                                             | 18 (17)            |         |
| NNRTI                                                                            | 28 (27)            |         |
| INSTI                                                                            | 1 (3)              |         |
|                                                                                  | HyDRA <sup>2</sup> | PASeq   |
| Any (≥1) DRM detected by NGS, n (% of tests)                                     | 60 (42)            | 63 (44) |
| PI                                                                               | 11 (11)            | 11 (10) |
| NRTI                                                                             | 27 (26)            | 24 (23) |
| NNRTI                                                                            | 36 (34)            | 39 (37) |
| INSTI                                                                            | 5 (13)             | 4 (10)  |

<sup>1</sup> Percentages calculated based on 113 unique patients in test cohort: 29 patients had both

Pr-RT and INT tests and 2 patients had a repeat Pr-RT test during the sample period.

(Protease-reverse transcriptase test) PI: protease inhibitors; NRTI:

nucleoside/nucleotide reverse transcriptase inhibitors; NNRTI: non-nucleoside

reverse transcriptase inhibitors

(Integrase test) INSTI: integrase inhibitors

457

458 <sup>2</sup> HyDRA DRMs were used as the “NGS” value for subsequent analyses in the patient follow-

459 up cohort that compared Sanger to NGS resistance profiles.

460 **Table 2.** Demographic and clinical characteristics of patients included in the patient follow-

461 up cohort.

| Patient characteristics                                                  | No low frequency DRMs (n=47) | Low frequency DRMs detected (n=22) | p-value* | (n=69)        |
|--------------------------------------------------------------------------|------------------------------|------------------------------------|----------|---------------|
| Patient age – median (IQR)                                               | 40 (32 – 48)                 | 40 (36 -51)                        | 0.34     | 40 (33-48)    |
| Men (%)                                                                  | 43 (91)                      | 18 (82)                            | 0.44     | 61 (88)       |
| Total follow-up [days] – median (IQR)                                    | 656 (557-705)                | 713 (638-750)                      | 0.46     | 674 (560-728) |
| Plasma HIV RNA, baseline [log10(copies/mL)] – median (IQR)               | 4.2 (3.6-4.9)                | 4.2 (3.9-4.6)                      | 0.41     | 4.2 (3.8-4.8) |
| - Missing                                                                | 4                            | 1                                  |          | 5             |
| Virological failure (%)                                                  | 16 (34)                      | 11 (50)                            | 0.32     | 27 (39)       |
| - Rate (per 10,000 person-days)                                          | 6.4                          | 10.3                               |          | 7.5           |
| Changed drug regimen from baseline (%)                                   | 10 (21)                      | 2 (9)                              | 0.37     | 12 (17)       |
| Received repeat Sanger resistance genotyping in follow-up (%)            | 9 (19)                       | 3 (14)                             | 0.82     | 12 (17)       |
| Treatment naïve (%)                                                      | 10 (25)                      | 1 (7)                              | 0.26     | 11 (25)       |
| - Missing                                                                | 7                            | 7                                  |          | 14            |
| Drugs included in prescribed regimen (% of patients):                    |                              |                                    |          |               |
| PI                                                                       | 15 (32)                      | 6 (27)                             | 0.91     | 21 (30)       |
| NRTI                                                                     | 47 (100)                     | 22 (100)                           | -        | 69 (100)      |
| NNRTI                                                                    | 3 (6)                        | 0 (0)                              | 0.20     | 3 (4)         |
| INSTI                                                                    | 39 (83)                      | 17 (77)                            | 0.81     | 56 (81)       |
| Reported as resistant to any drug by clinical genotyping, n (% of tests) | 16 (34)                      | 9 (41)                             | 0.78     | 25 (36)       |
| Low frequency DRM detected (% of patients):                              |                              |                                    |          | 22 (32)       |

|       |   |        |   |   |
|-------|---|--------|---|---|
| PI    | 0 | 6 (27) | - | 6 |
| NRTI  | 0 | 9 (41) | - | 9 |
| NNRTI | 0 | 7 (32) | - | 7 |
| INSTI | 0 | 4 (18) | - | 4 |

\*Student t-test (means) or proportion test, as applicable: comparing patients with no low frequency DRMs to those with low frequency DRMs.

## References

- UNAIDS. 2017. Fact sheet - Latest statistics on the status of the AIDS epidemic. <http://www.unaids.org/en/resources/fact-sheet>. Accessed
- WHO. 2017. HIV drug resistance: tackling HIV drug resistance: trends, guidelines and global actions: policy brief.
- Baxter JD, Mayers DL, Wentworth DN, Neaton JD, Hoover ML, Winters MA, Mannheimer SB, Thompson MA, Abrams DI, Brizz BJ, Ioannidis JP, Merigan TC. 2000. A randomized study of antiretroviral management based on plasma genotypic antiretroviral resistance testing in patients failing therapy. CPCRA 046 Study Team for the Terry Bein Community Programs for Clinical Research on AIDS. Aids 14:F83-93.
- Palella FJ, Jr., Armon C, Buchacz K, Cole SR, Chmiel JS, Novak RM, Wood K, Moorman AC, Brooks JT. 2009. The association of HIV susceptibility testing with survival among HIV-infected patients receiving antiretroviral therapy: a cohort study. Ann Intern Med 151:73-84.
- Sax PE, Islam R, Walensky RP, Losina E, Weinstein MC, Goldie SJ, Sadownik SN, Freedberg KA. 2005. Should resistance testing be performed for

482 treatment-naive HIV-infected patients? A cost-effectiveness analysis. Clin  
483 Infect Dis 41:1316-23.

484 6. Leitner T, Halapi E, Scarlatti G, Rossi P, Albert J, Fenyo EM, Uhlen M. 1993.  
485 Analysis of heterogeneous viral populations by direct DNA sequencing.  
486 Biotechniques 15:120-7.

487 7. Halvas EK, Aldrovandi GM, Balfe P, Beck IA, Boltz VF, Coffin JM, Frenkel LM,  
488 Hazelwood JD, Johnson VA, Kearney M, Kovacs A, Kuritzkes DR, Metzner KJ,  
489 Nissley DV, Nowicki M, Palmer S, Ziermann R, Zhao RY, Jennings CL, Bremer J,  
490 Brambilla D, Mellors JW. 2006. Blinded, Multicenter Comparison of Methods  
491 To Detect a Drug-Resistant Mutant of Human Immunodeficiency Virus Type 1  
492 at Low Frequency. J Clin Microbiol 44:2612-4.

493 8. Dudley DM, Chin EN, Bimber BN, Sanabani SS, Tarosso LF, Costa PR, Sauer  
494 MM, Kallas EG, O'Connor DH. 2012. Low-cost ultra-wide genotyping using  
495 Roche/454 pyrosequencing for surveillance of HIV drug resistance. PLoS One  
496 7:e36494.

497 9. Casadellà M, Paredes R. 2017. Deep sequencing for HIV-1 clinical  
498 management. Virus Research 239:69-81.

499 10. Raymond S, Nicot F, Carcenac R, Lefebvre C, Jeanne N, Saune K, Delobel P,  
500 Izopet J. 2018. HIV-1 genotypic resistance testing using the Vela automated  
501 next-generation sequencing platform. J Antimicrob Chemother 73:1152-  
502 1157.

503 11. Cozzi-Lepri A, Noguera-Julian M, Di Giallonardo F, Schuurman R, Daumer M,  
504 Aitken S, Ceccherini-Silberstein F, D'Arminio Monforte A, Geretti AM, Booth

505 CL, Kaiser R, Michalik C, Jansen K, Masquelier B, Bellecave P, Kouyos RD,  
506 Castro E, Furrer H, Schultze A, Gunthard HF, Brun-Vezinet F, Paredes R,  
507 Metzner KJ. 2015. Low-frequency drug-resistant HIV-1 and risk of virological  
508 failure to first-line NNRTI-based ART: a multicohort European case-control  
509 study using centralized ultrasensitive 454 pyrosequencing. *J Antimicrob*  
510 *Chemother* 70:930-40.

511 12. Dunn DT, Stöhr W, Arenas-Pinto A, Tostevin A, Mbisa JL, Paton NI, or the  
512 Protease Inhibitor Monotherapy Versus Ongoing Triple Therapy PTT. 2018.  
513 Next generation sequencing of HIV-1 protease in the PIVOT trial of protease  
514 inhibitor monotherapy. *Journal of Clinical Virology* 101:63-65.

515 13. Fisher R, van Zyl GU, Travers SA, Kosakovsky Pond SL, Engelbrech S, Murrell  
516 B, Scheffler K, Smith D. 2012. Deep sequencing reveals minor protease  
517 resistance mutations in patients failing a protease inhibitor regimen. *J Virol*  
518 86:6231-7.

519 14. Fonager J, Larsson JT, Hussing C, Neess Engsig F, Nielsen C, Fischer TK. 2015.  
520 Identification of minority resistance mutations in the HIV-1 integrase coding  
521 region using next generation sequencing. *J Clin Virol* 73:95-100.

522 15. Kyeyune F, Gibson RM, Nankya I, Venner C, Metha S, Akao J, Ndashimye E,  
523 Kityo CM, Salata RA, Mugenyi P, Arts EJ, Quiñones-Mateu ME. 2016. Low-  
524 Frequency Drug Resistance in HIV-Infected Ugandans on Antiretroviral  
525 Treatment Is Associated with Regimen Failure. *Antimicrobial Agents and*  
526 *Chemotherapy* 60:3380-3397.

- 527 16. Moscona R, Ram D, Wax M, Bucris E, Levy I, Mendelson E, Mor O. 2017.  
528 Comparison between next-generation and Sanger-based sequencing for the  
529 detection of transmitted drug-resistance mutations among recently infected  
530 HIV-1 patients in Israel, 2000–2014. *Journal of the International AIDS Society*  
531 20:21846.
- 532 17. Nicot F, Saliou A, Raymond S, Saune K, Dubois M, Massip P, Marchou B,  
533 Delobel P, Izopet J. 2012. Minority variants associated with resistance to HIV-  
534 1 nonnucleoside reverse transcriptase inhibitors during primary infection. *J*  
535 *Clin Virol* 55:107-13.
- 536 18. Storto A, Visseaux B, Bertine M, Le Hingrat Q, Collin G, Damond F, Khuong  
537 MA, Blum L, Tubiana R, Karmochkine M, Cazanave C, Matheron S, Descamps  
538 D, Charpentier C. 2018. Minority resistant variants are also present in HIV-2-  
539 infected antiretroviral-naïve patients. *J Antimicrob Chemother.*
- 540 19. Todesco E, Charpentier C, Bertine M, Wirden M, Storto A, Desire N, Grude M,  
541 Nguyen T, Sayon S, Yazdanpanah Y, Katlama C, Descamps D, Calvez V,  
542 Marcelin AG. 2017. Disparities in HIV-1 transmitted drug resistance detected  
543 by ultradeep sequencing between men who have sex with men and  
544 heterosexual populations. *HIV Med* 18:696-700.
- 545 20. Tzou PL, Ariyaratne P, Varghese V, Lee C, Rakhmanaliev E, Villy C, Yee M, Tan  
546 K, Michel G, Pinsky BA, Shafer RW. 2018. Comparison of an In Vitro  
547 Diagnostic Next-Generation Sequencing Assay with Sanger Sequencing for  
548 HIV-1 Genotypic Resistance Testing. *J Clin Microbiol* 56.

- 549 21. Gunthard HF, Calvez V, Paredes R, Pillay D, Shafer RW, Wensing AM, Jacobsen  
550 DM, Richman DD. 2018. Human Immunodeficiency Virus Drug Resistance:  
551 2018 Recommendations of the International Antiviral Society-USA Panel. Clin  
552 Infect Dis.
- 553 22. Li JZ, Kuritzkes DR. 2013. Clinical Implications of HIV-1 Minority Variants.  
554 Clinical Infectious Diseases: An Official Publication of the Infectious Diseases  
555 Society of America 56:1667-1674.
- 556 23. Stella-Ascariz N, Arribas JR, Paredes R, Li JZ. 2017. The Role of HIV-1 Drug-  
557 Resistant Minority Variants in Treatment Failure. The Journal of Infectious  
558 Diseases 216:S847-S850.
- 559 24. Li JZ, Paredes R, Ribaud H, Svarovskaia ES, Metzner KJ, Kozal MJ, Hullsiek  
560 KH, Balduin M, Jakobsen MR, Geretti AM, Thiebaut R, Ostergaard L,  
561 Masquelier B, Johnson JA, Miller MD, Kuritzkes DR. 2011. Minority HIV-1  
562 Drug Resistance Mutations and the Risk of NNRTI-based Antiretroviral  
563 Treatment Failure: A Systematic Review and Pooled Analysis. Jama  
564 305:1327-1335.
- 565 25. Services USDoHaH. 2017. What to Start: Initial Combination Regimens for the Antiretroviral-Naive  
566 Patient [https://aidsinfo.nih.gov/guidelines/html/1/adult-and-adolescent-](https://aidsinfo.nih.gov/guidelines/html/1/adult-and-adolescent-arv/11/what-to-start--initial-combination-regimens-for-the-antiretroviral-naive-patient)  
567 [arv/11/what-to-start--initial-combination-regimens-for-the-antiretroviral-](https://aidsinfo.nih.gov/guidelines/html/1/adult-and-adolescent-arv/11/what-to-start--initial-combination-regimens-for-the-antiretroviral-naive-patient)  
568 [naive-patient](https://aidsinfo.nih.gov/guidelines/html/1/adult-and-adolescent-arv/11/what-to-start--initial-combination-regimens-for-the-antiretroviral-naive-patient).
- 569 26. Llibre JM, Pulido F, Garcia F, Garcia Deltoro M, Blanco JL, Delgado R. 2015.  
570 Genetic barrier to resistance for dolutegravir. AIDS Rev 17:56-64.

- 571 27. Nguyen T, Fofana DB, Lê MP, Charpentier C, Peytavin G, Wirten M, Lambert-  
572 Niclot S, Desire N, Grude M, Morand-Joubert L, Flandre P, Katlama C,  
573 Descamps D, Calvez V, Todesco E, Marcelin AG. 2018. Prevalence and clinical  
574 impact of minority resistant variants in patients failing an integrase  
575 inhibitor-based regimen by ultra-deep sequencing. *Journal of Antimicrobial*  
576 *Chemotherapy*:dky198-dky198.
- 577 28. Stellbrink H-J, Reynes J, Lazzarin A, Voronin E, Pulido F, Felizarta F, Almond S,  
578 Clair MS, Flack N, Min S, the extended S-T. 2013. Dolutegravir in  
579 antiretroviral-naïve adults with HIV-1: 96-week results from a randomized  
580 dose-ranging study. *AIDS (London, England)* 27:1771-1778.
- 581 29. Charpentier C, Laureillard D, Piketty C, Tisserand P, Batisse D, Karmochkine  
582 M, Si-Mohamed A, Weiss L. 2010. High frequency of integrase Q148R  
583 minority variants in HIV-infected patients naïve of integrase inhibitors. *AIDS*  
584 24:867-73.
- 585 30. Perrier M, Visseaux B, Landman R, Joly V, Todesco E, Yazdanpanah Y, Calvez  
586 V, Marcelin AG, Descamps D, Charpentier C. 2018. No impact of HIV-1  
587 protease minority resistant variants on the virological response to a first-line  
588 PI-based regimen containing darunavir or atazanavir. *J Antimicrob*  
589 *Chemother* 73:173-176.
- 590 31. Lataillade M, Chiarella J, Yang R, Schnittman S, Wirtz V, Uy J, Seekins D,  
591 Krystal M, Mancini M, McGrath D, Simen B, Egholm M, Kozal M. 2010.  
592 Prevalence and clinical significance of HIV drug resistance mutations by

593 ultra-deep sequencing in antiretroviral-naive subjects in the CASTLE study.  
 594 PLoS One 5:e10952.

595 32. Metzner KJ, Rauch P, von Wyl V, Leemann C, Grube C, Kuster H, Böni J, Weber  
 596 R, Günthard HF. 2010. Efficient Suppression of Minority Drug-Resistant HIV  
 597 Type 1 (HIV-1) Variants Present at Primary HIV-1 Infection by Ritonavir-  
 598 Boosted Protease Inhibitor-Containing Antiretroviral Therapy. The Journal of  
 599 Infectious Diseases 201:1063-1071.

600 33. Ross LL, Weinberg WG, DeJesus E, Fischl MA, Horton JH, Pappa KA, Lancaster  
 601 CT, Pakes GE, Smith KY. 2010. Impact of low abundance HIV variants on  
 602 response to ritonavir-boosted atazanavir or fosamprenavir given once daily  
 603 with tenofovir/emtricitabine in antiretroviral-naive HIV-infected patients.  
 604 AIDS Res Hum Retroviruses 26:407-17.

605 34. Simen BB, Simons JF, Hullsiek KH, Novak RM, Macarthur RD, Baxter JD,  
 606 Huang C, Lubeski C, Turenchalk GS, Braverman MS, Desany B, Rothberg JM,  
 607 Egholm M, Kozal MJ. 2009. Low-abundance drug-resistant viral variants in  
 608 chronically HIV-infected, antiretroviral treatment-naive patients significantly  
 609 impact treatment outcomes. J Infect Dis 199:693-701.

610 35. Constantine D. 2017. King County among the first in the nation to achieve a  
 611 global milestone in the fight against HIV/AIDS,  
 612 [https://www.kingcounty.gov/elected/executive/constantine/news/release/](https://www.kingcounty.gov/elected/executive/constantine/news/release/2017/February/09-hiv-global-milestone.aspx)  
 613 [2017/February/09-hiv-global-milestone.aspx](https://www.kingcounty.gov/elected/executive/constantine/news/release/2017/February/09-hiv-global-milestone.aspx).

- 614 36. Pepper G. 1999. Human Immunodeficiency Virus (HIV) Genotypic Resistance  
615 Assay., 2015 ed. University of Washington, Department of Laboratory  
616 Medicine, Virology Division.
- 617 37. Boom R, Sol CJ, Salimans MM, Jansen CL, Dillen PMW-v, Noordaa Jvd. 1990.  
618 Rapid and simple method for purification of nucleic acids.
- 619 38. Liu TF, Shafer RW. 2006. Web resources for HIV type 1 genotypic-resistance  
620 test interpretation. Clin Infect Dis 42:1608-18.
- 621 39. Martin M. 2011. Cutadapt removes adapter sequences from high-throuput  
622 sequencing reads. EMBnetjournal 17:10-12.
- 623 40. Noguera-Julian M, Edgil D, Harrigan PR, Sandstrom P, Godfrey C, Paredes R.  
624 2017. Next-Generation Human Immunodeficiency Virus Sequencing for  
625 Patient Management and Drug Resistance Surveillance. J Infect Dis 216:S829-  
626 s833.
- 627 41. Nykoluk M, Taylor T, Ji H, Enns E. 2016. HyDRA Web User Guide.
- 628 42. Services USDoHaH. 2017. Guidelines for the Use of Antiretroviral Agents in  
629 Adults and Adolescents Living with HIV: Virological Failure,  
630 [https://aidsinfo.nih.gov/guidelines/html/1/adult-and-adolescent-](https://aidsinfo.nih.gov/guidelines/html/1/adult-and-adolescent-arv/15/virologic-failure)  
631 [arv/15/virologic-failure](https://aidsinfo.nih.gov/guidelines/html/1/adult-and-adolescent-arv/15/virologic-failure).
- 632 43. Nakazawa M. 2018. fmsb: Functions for Medical Statistics Book with some  
633 Demographic Data. R package version 0.6.3.
- 634 44. Clutter DS, Zhou S, Varghese V, Rhee S-Y, Pinsky BA, Jeffrey Fessel W, Klein  
635 DB, Spielvogel E, Holmes SP, Hurley LB, Silverberg MJ, Swanstrom R, Shafer  
636 RW. 2017. Prevalence of Drug-Resistant Minority Variants in Untreated HIV-

637 1-Infected Individuals With and Those Without Transmitted Drug Resistance  
638 Detected by Sanger Sequencing. The Journal of Infectious Diseases 216:387-  
639 391.

640 45. Rhee S-Y, Clutter D, Fessel WJ, Klein D, Slome S, Pinsky BA, Marcus JL, Hurley  
641 L, Silverberg MJ, Kosakovsky Pond SL, Shafer RW. 2018. Trends in the  
642 Molecular Epidemiology and Genetic Mechanisms of Transmitted Human  
643 Immunodeficiency Virus Type 1 Drug Resistance in a Large US Clinic  
644 Population. Clinical Infectious Diseases:ciy453-ciy453.

645 46. Li JZ. 2014. HIV-1 Drug-Resistant Minority Variants: Sweating the Small Stuff.  
646 The Journal of Infectious Diseases 209:639-641.

647

648 **Figure 1. Sequencing protocol comparison.**

649 A) First-round amplicons from clinical resistance genotyping by Sanger sequencing were  
650 also processed by next-generation sequencing and the resultant resistance profiles  
651 compared.

652 B) Test cohort included drug resistance genotyping tests originally performed as part of  
653 routine HIV care at UW Medicine between February and May 2016, and patient cohort  
654 included those patients who provided tests in the test cohort and had available follow-up  
655 records between sample date and May 25, 2018.

656

657 **Figure 2. Histogram of DRM frequency by method of sequencing.**

658 Number of DRMs detected at each allele frequency, by NGS only (red), by both Sanger and  
659 NGS (blue), and by Sanger only (yellow). A-D letters highlight disagreements found between

NGS and Sanger variant calls made at the 20% allele frequency threshold expected for Sanger sequencing. Each instance is detailed in the corresponding letter of Figure 3.

**Figure 3. Discrepancies between Sanger and NGS variant calls at 20% allele frequency threshold.**

A) Sanger called a mixed L210CW variant, which is associated with resistance to three NRTI drugs. However, neither NGS caller called the variant as a DRM because they recognized the linkage between two adjacent nucleotide bases, which clarified the variant as TGT (C – cysteine; polymorphism), rather than a mixture that included TGG (W – tryptophan; DRM). Three different DRMs were called by Sanger sequencing that were detected at less than 20% allele frequency by NGS, including V108I (16-17%, B), K103N (7-9%, C), and H221Y (18%, D).

**Figure 4. Concordance of allele frequency calls by HyDRA and PASEq variant callers.**

A) Bland-Altman plot comparing allele frequency measurements for variants called by PASEq and HyDRA. B-1) Correlation plot of allele frequency measurements for variants called by PASEq (x-axis) versus HyDRA (y-axis). Accessory mutations are in blue and DRMs are labeled in red. The default setting of HyDRA includes calls of many more accessory variants than PASEq, which led to the large number of accessory mutations called by HyDRA but not by PASEq. The accessory mutation S168G (blue) was called by both callers at 90% allele frequency. B-2) Zoomed in view of 1-2% frequency range (cluster of observations in bottom left corner of Figure 4B-1). \*For figure illustration, all true zero values were assigned a random uniform value between 0-1% in (A) and 0-0.1% in (B).

## **Figure 5. Results of clinical follow-up for patients and theoretical model.**

A) Low frequency DRMs are correlated with ongoing medication adherence, as a result of prior drug experience and current selective drug pressure, which is thus associated with virological failure, regardless of drug resistance. B) Stratification of clinical outcomes in patient cohort, given the presence or absence of low frequency DRMs associated with reduced susceptibility to their drug regimen. Adherence was defined as documentation of poor medication adherence in clinical chart. Virological failure was defined as plasma HIV RNA level >200 copies/mL at a test date more than one month after baseline.

[a] Lamivudine/zidovudine was replaced with emtricitabine/tenofovir following poor adherence in patient's regimen, potentially contributing to subsequent suppression.

[b] Darunavir was replaced with dolutegravir in both patients' regimens, potentially contributing to subsequent suppression.

Days-at-risk refers to time between sample date and censor date. Patients were censored at date of measured virological failure or last available plasma HIV RNA quantification test.

Days follow-up includes all days between sample date and last plasma HIV RNA quantification test.

## **Supplemental Material**

### **Figure S-1. Agreement of Sanger and NGS variant resistance interpretations at 20% and 1% cutoffs.**

Low frequency DRMs refer to those between 1-20% frequency and were only called by NGS. Tests with agreement between Sanger and NGS (green); disagreement (blue); Sanger false-positive due to inability to detect linkage (orange).

710 **Figure S-2. Low frequency variants detected in patients with a range of viral loads.**

711 A) Boxplot distribution of patients' viral load [plasma HIV RNA log(copies/mL)] at sample  
712 date for samples with and without detected low frequency DRMs.

713 B) Viral load of patient in which a low frequency DRM was detected and the allele frequency  
714 of the detected DRM(s).

715

Figure 1. Sequencing protocol comparison.

A) First-round amplicons from clinical resistance genotyping by Sanger sequencing were also processed by next-generation sequencing and the resultant resistance profiles compared.

B) Test cohort included drug resistance genotyping tests originally performed as part of routine HIV care at UW Medicine between February and May 2016, and patient cohort included those patients who provided tests in the test cohort and had available follow-up records between sample date and May 25, 2018.

A

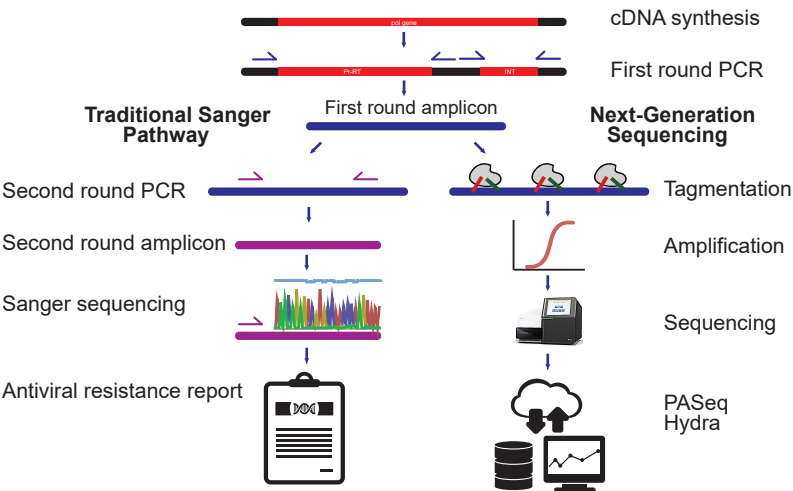

B

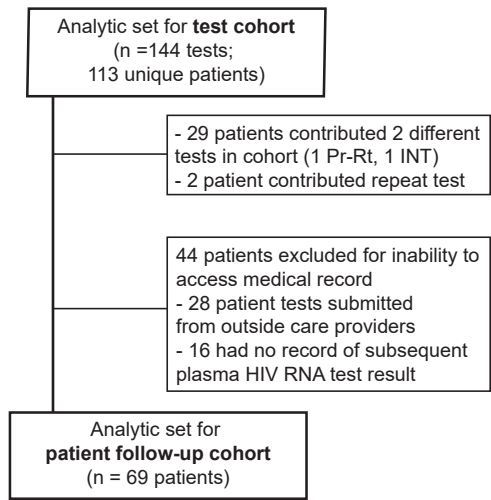

Figure 2. Histogram of DRM frequency by method of sequencing. Number of DRMs detected at each allele frequency, by NGS only (red) by both Sanger and NGS (blue), and by Sanger only (yellow). . A-D letters highlight disagreements found between NGS and Sanger variant calls made at the 20% allele frequency threshold expected for Sanger sequencing. Each instance is detailed in the corresponding letter of Figure 3.

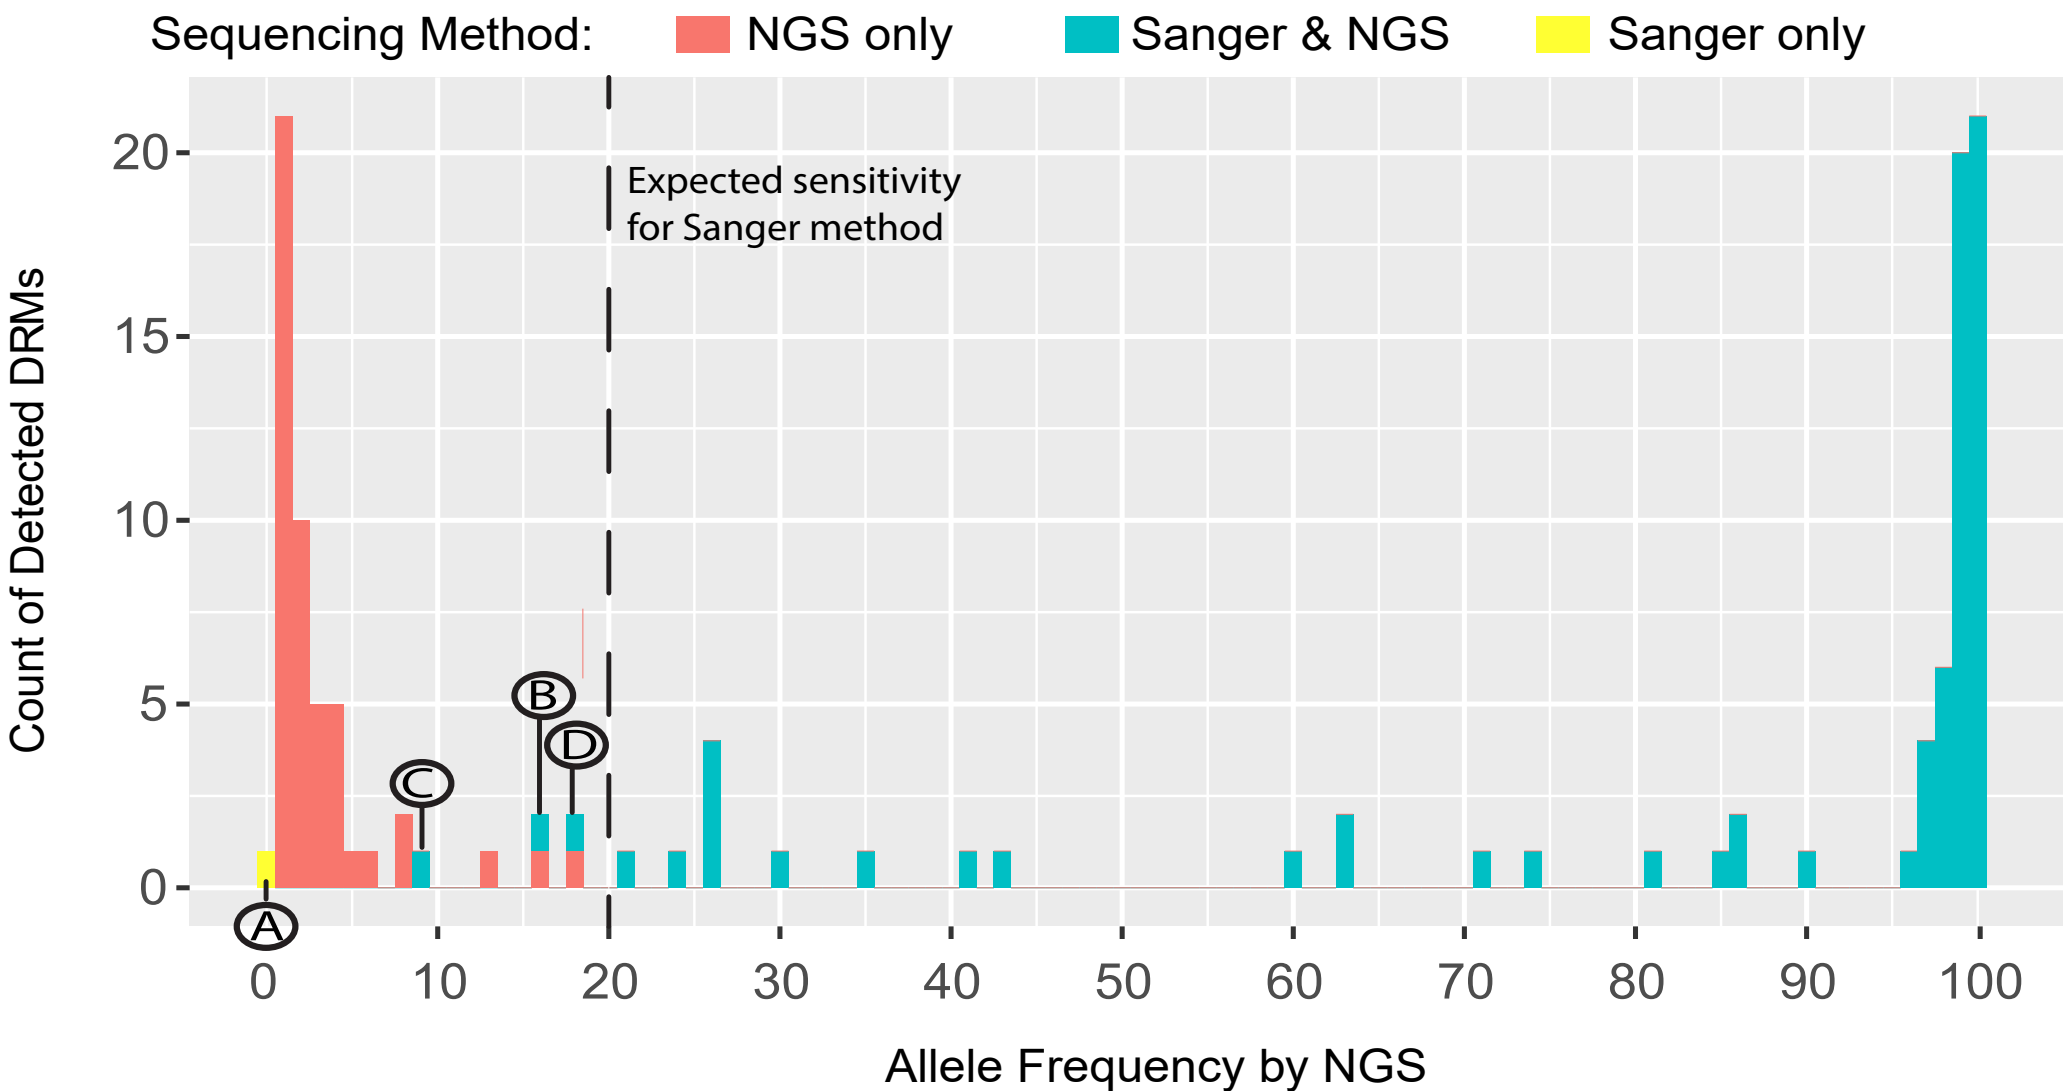

**A**

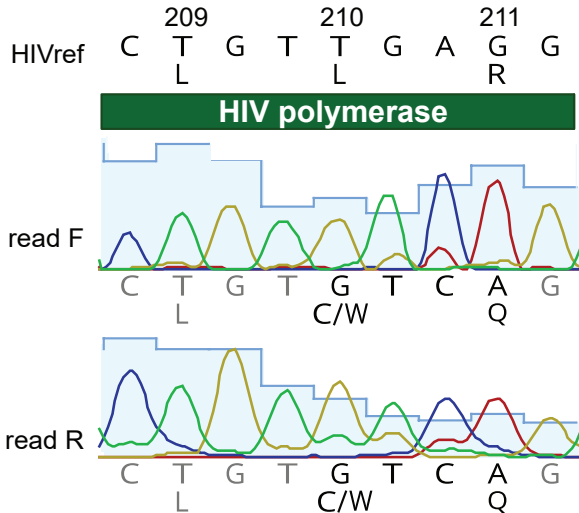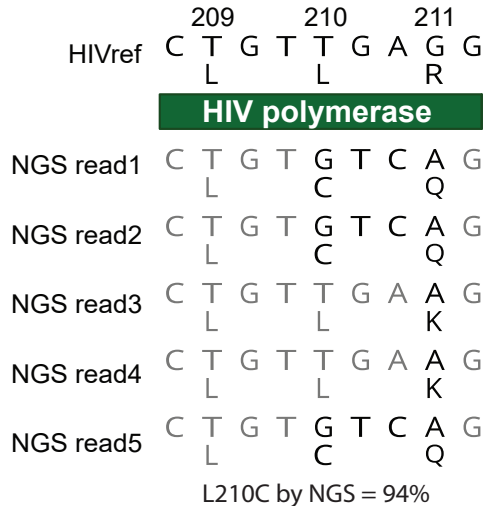

**B**

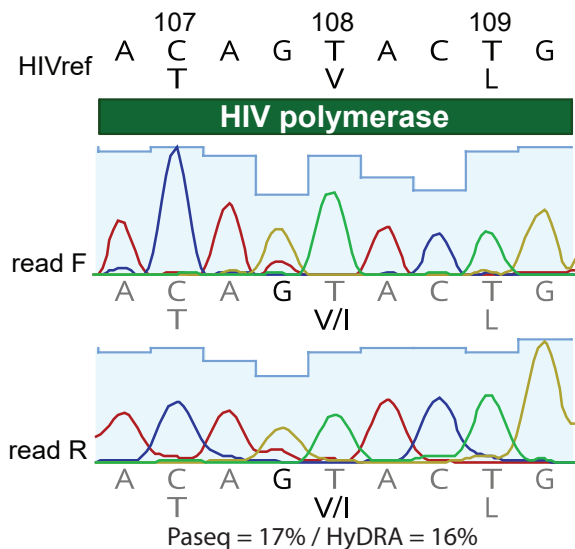

**C**

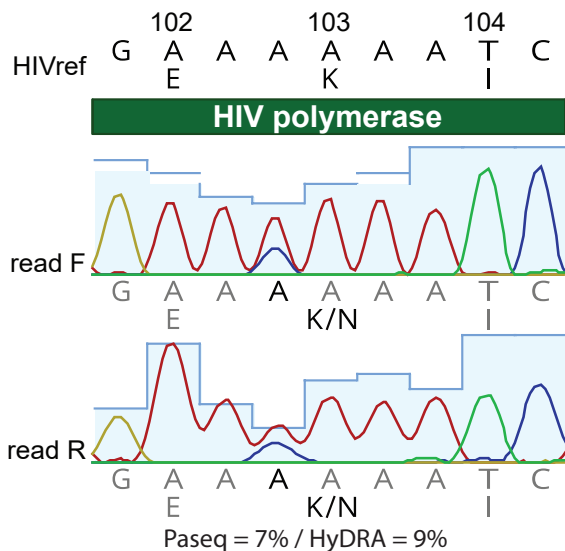

**D**

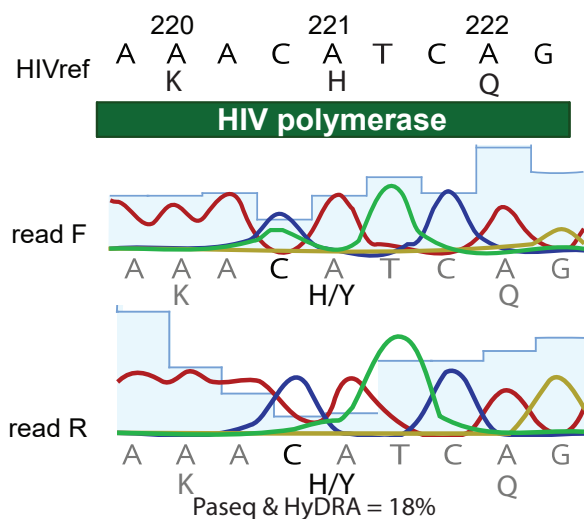

Figure 3. Discrepancies between Sanger and NGS variant calls at 20% allele frequency threshold.

A) Sanger called a mixed L210CW variant, which is associated with resistance to three NRTI drugs. However, neither NGS caller called the variant as a DRM because they recognized the linkage between two adjacent nucleotide bases, which clarified the variant as TGT (C – cysteine; polymorphism), rather than a mixture that included TGG (W – tryptophan; DRM). Three different DRMs were called by Sanger sequencing that were detected at less than 20% allele frequency by NGS, including V108I (16-17%, B), K103N (7-9%, C), and H221Y (18%, D).

A

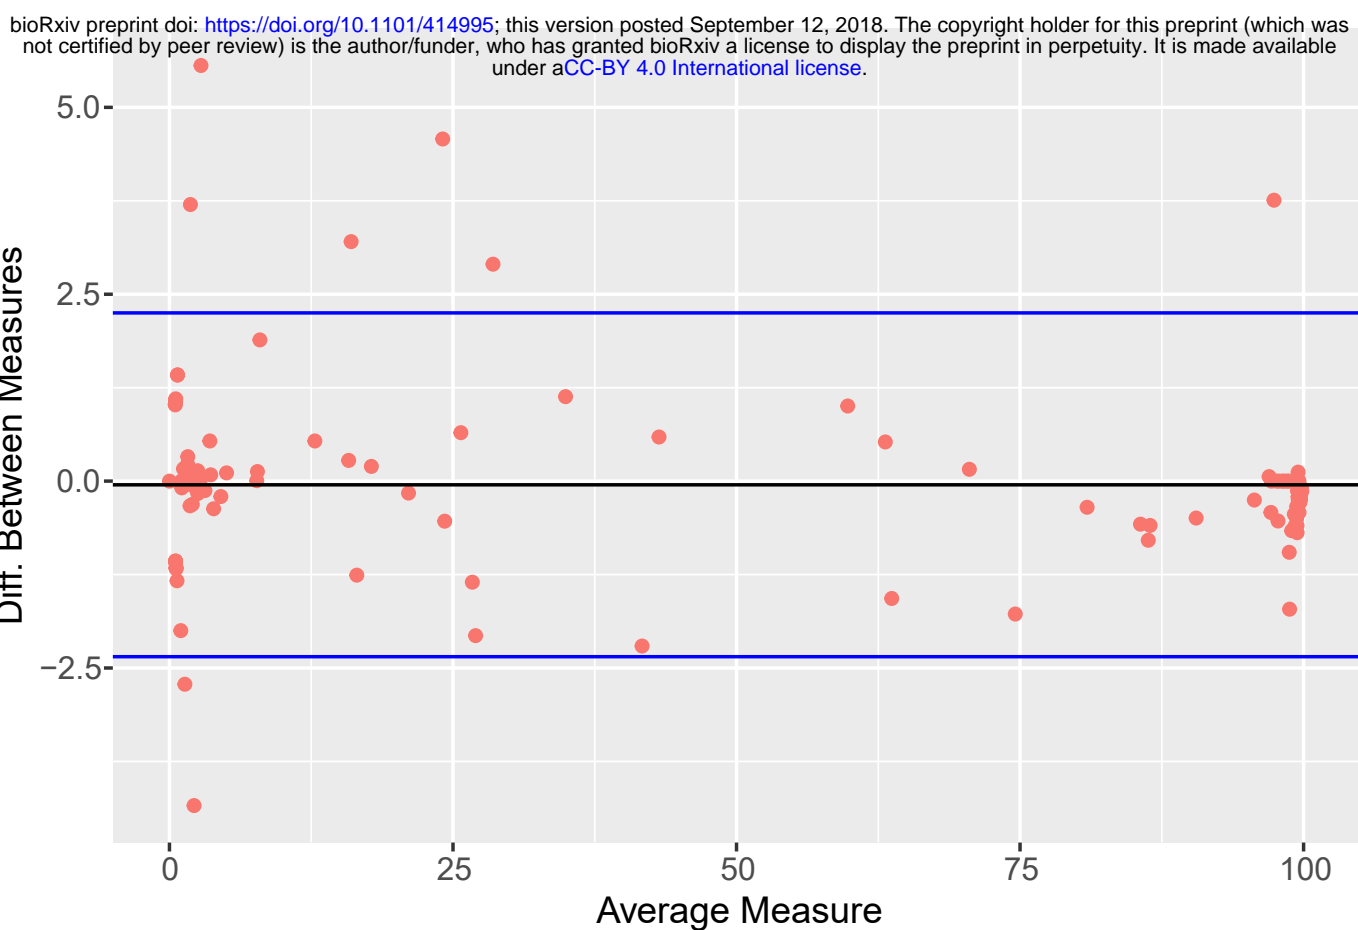

B-1

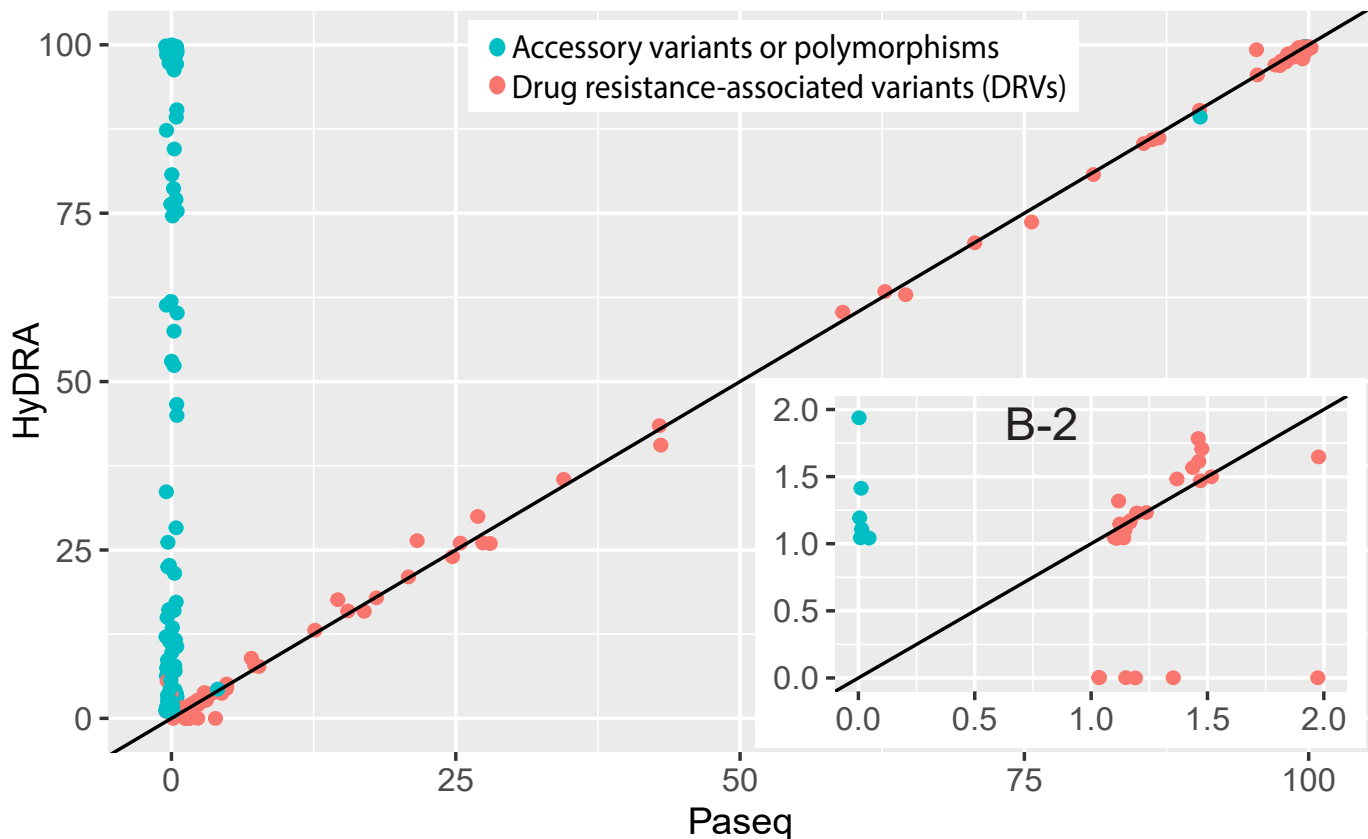

Figure 4. Concordance of allele frequency calls by HyDRA and PASEq variant callers.

A) Bland-Altman plot comparing allele frequency measurements for variants called by PASEq and HyDRA.

B-1) Correlation plot of allele frequency measurements for variants called by PASEq (x-axis) versus HyDRA (y-axis).

Accessory mutations are in blue and DRMs are labeled in red. The default setting of HyDRA includes calls of many more accessory variants than PASEq, which led to the large number of accessory mutations called by HyDRA but not by PASEq.

The accessory mutation S168G (blue) was called by both callers at 90% allele frequency. B-2) Zoomed in view of 1-2% frequency range (cluster of observations in bottom left corner of Figure 4B-1). \*For figure illustration, all true zero values were assigned a random uniform value between 0-1% in (A) and 0-0.1% in (B).

A

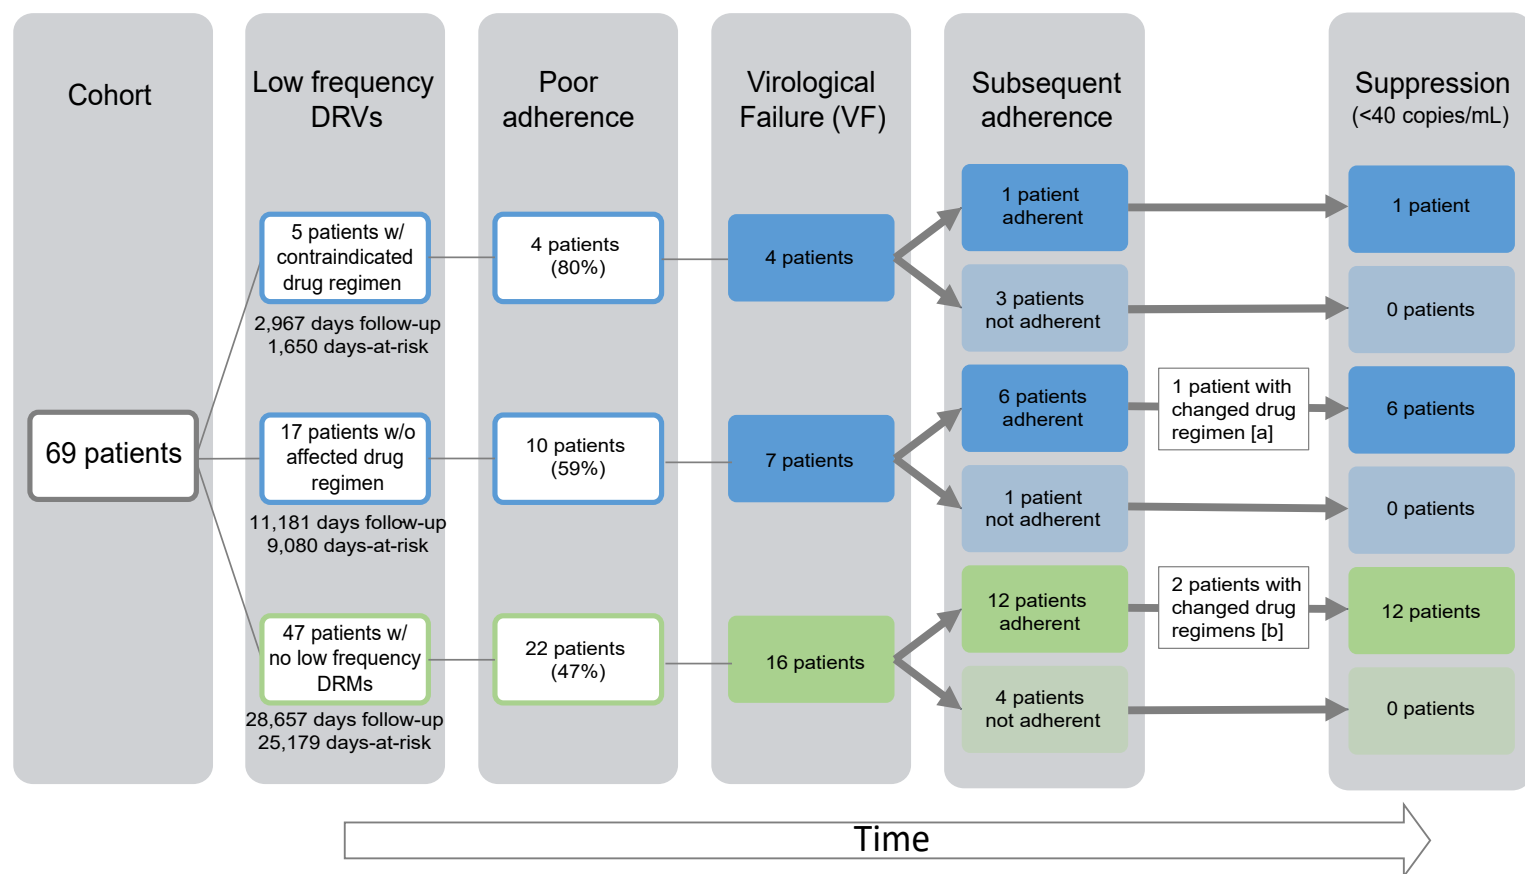

B

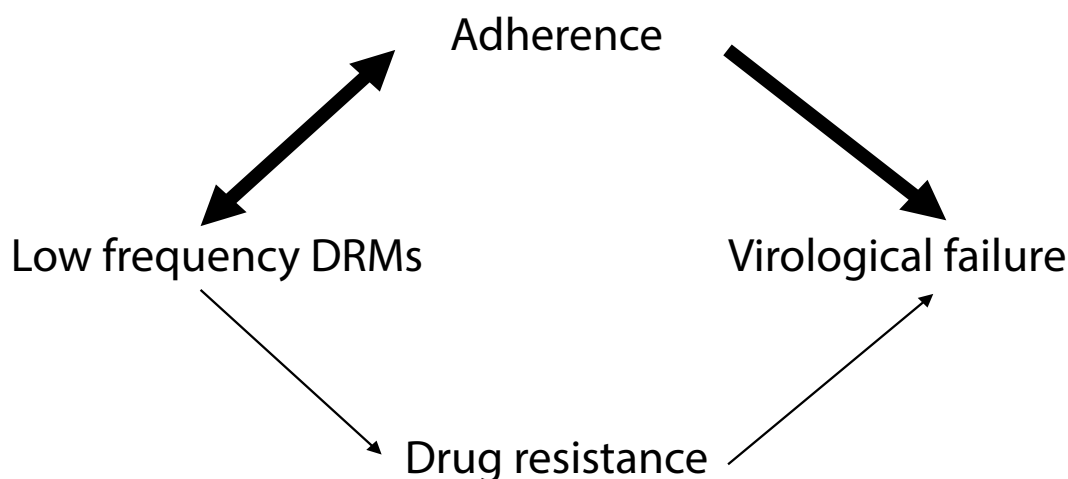

Figure 5. Results of clinical follow-up for patients and theoretical model.

A) Low frequency DRMs are correlated with ongoing medication adherence, as a result of prior drug experience and current selective drug pressure, which is thus associated with virological failure, regardless of drug resistance. B) Stratification of clinical outcomes in patient cohort, given the presence or absence of low frequency DRMs associated with reduced susceptibility to their drug regimen. Adherence was defined as documentation of poor medication adherence in clinical chart. Virological failure was defined as plasma HIV RNA level >200 copies/mL at a test date more than one month after baseline. [a] Lamivudine/zidovudine was replaced with emtricitabine/tenofovir following poor adherence in patient's regimen, potentially contributing to subsequent suppression. [b] Darunavir was replaced with dolutegravir in both patients' regimens; potentially contributed to subsequent suppression. Days-at-risk refers to time between sample date and censor date. Patients were censored at date of measured virological failure or last available plasma HIV RNA quantification test. Days follow-up includes all days between sample date and last plasma HIV RNA quantification test date.
